# Supplementary material for: CONCERN: Does ovary need D-chiro-inositol?
Source: PubMed Central journal article supplement (PMC3447676; doi:10.1186/1757-2215-5-14), 2012-05-15

**Embryo Grade I**

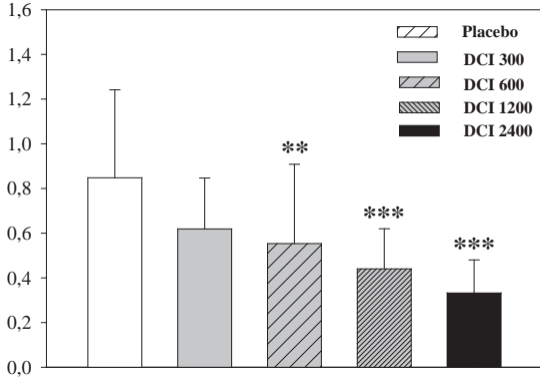

Supplement: 13048_2012_98_MOESM3_ESM.pdf [file 13048_2012_98_MOESM3_ESM.pdf]
